1 **Relative cost of counselling compared to supplementary foods for acute**  
2 **malnutrition: a time and motion study in Nairobi Kenya**

3 Antonina N. Mutoro<sup>1,3</sup>

4 Eleanor Grieve<sup>2</sup>

5 Ada L. Garcia<sup>1</sup>

6 Charlotte Wright<sup>1\*</sup>

1. Human Nutrition department, School of Medicine, Dentistry and Nursing, University of Glasgow UK

7 2. Health Economics and Health Technology Assessment, School of Health and Wellbeing,  
8 University of Glasgow, UK

9 3. Maternal and Child Wellbeing Unit, African Population and Health Research Centre  
10 (APHRC) Nairobi, Kenya

11

12 **Short title:** Relative cost of counselling compared to supplementary foods.

13

14 **\*Corresponding author:**

15 Email [charlotte.wright@glasgow.ac.uk](mailto:charlotte.wright@glasgow.ac.uk)

16

17

## 18 Abstract

### 19 Aims

20 We aimed to describe the relative cost of supplying supplementary food, compared to  
21 counselling, in children with acute malnutrition managed in one urban area.

### 22 Method

23 A cross-sectional costing study was undertaken. Interviews with staff and time-and-motion  
24 observations of children with acute malnutrition and their carers attending 6 ambulatory  
25 nutrition treatment centres in Nairobi were conducted to assess the time nutritionists spent  
26 treating acute malnutrition and managing ready to use food supplies. Kenyan standard pay  
27 rates (\$) were used to calculate the monthly staff cost of reviewing each child and speaking to  
28 their parent. These were compared to the published cost of purchasing daily ready to use  
29 food sachets.

### 30 Results

31 Consultations with 32 children were observed, 3-8 per clinic. Staff spent mean (SD) 9.84  
32 (4.9) minutes seeing each child, of which at most only 3.5 (2.0) minutes were spent  
33 counselling the family. With an hourly pay rate of \$4.87, the median (IQR) contact and  
34 dispensing cost per child visit was \$0.77 (0.49-1.16). The cost of RUF was estimated to be  
35 \$7.84 for a month's treatment, giving a total treatment cost of \$8.61 per child per month. If  
36 ready to use food was not prescribed and more staff time purchased instead, this would pay  
37 for 1.6 hours staff time per child per month.

### 38 Conclusions

39 Very little time was spent speaking to mothers of malnourished children and supplies of  
40 ready to use food represented 91% of total treatment costs.

## 42 Introduction

43 Moderate acute malnutrition (MAM) is a major public health problem in many low- and  
44 middle-income countries (LMIC). It is accountable for more deaths in children under 5 years  
45 than severe acute malnutrition (SAM) [1]. In 2019, approximately 32.7 million children were  
46 moderately wasted [2]. However, the best approach to treatment of MAM and rehabilitation  
47 of SAM after initial rescue remains unclear. Many supplementary feeding interventions have  
48 been trialled which aim to correct energy and nutrient deficiencies using specially formulated  
49 foods such as blended flours or, more recently, ready-to-use foods (RUF) which are offered  
50 in addition to a child's normal diet [3], but simply giving supplementary food has only  
51 limited effects [4][5] and their use is still not recommended by WHO, except in emergency  
52 settings. [6] This limited efficacy may reflect the multiple possible interacting causes of child  
53 undernutrition [7] and the possibility of misdiagnosis of intrauterine stunting as current  
54 undernutrition [6]. Nonetheless RUF is already used in the treatment of MAM in many  
55 countries, including Kenya [8]. At present RUF supplies are generally donated by external  
56 agencies, which presents sustainability challenges and recurrent periods with no supplies. As  
57 well as supplying RUF, the Kenyan MAM protocol specifies a baseline assessment, which  
58 should identify proximal issues, such as diet and caring practises, with nutritional and welfare  
59 advice given as required. However, this requires time, and most treatment centres are already  
60 heavily burdened and understaffed. We are developing an algorithm for the assessment of  
61 children with MAM to ensure that only acutely wasted children are identified as MAM using  
62 a proforma that ensures that all relevant risk factors are recorded and can inform advice and  
63 support for the family [9]. However, this takes around 20 minutes to complete, with further  
64 time needed at follow-up to reinforce advice given. In order to plan a trial of its use, we  
65 needed to know how much time is currently spent providing RUF and how much it would  
66 cost to fund extra staff time for counselling. This assessment would be expected to result in

67 less RUF being prescribed overall, so we also considered how much staff time could be  
68 funded by a reduction in expenditure on RUF. Previous economic studies have tended only to  
69 examine the cost effectiveness of community management of SAM [10-12] or to compare the  
70 cost of different RUF used in MAM without untreated or counselling comparisons[13].  
71 We thus planned an exploratory time and motion study to establish cost of staff time spent  
72 with families and administering and dispensing RUF, as well as the cost of RUF itself.

73

## 74 **Methods**

### 75 **Study design and setting**

76 This cross-sectional costing study was conducted in 2019 in Nairobi in 5 government health  
77 centres and one faith-based health facility of the 80 facilities in Nairobi which offer  
78 ambulatory therapeutic (OTP) and supplementary feeding programs (SFP) for acute  
79 malnutrition, (severe or moderate). These centres were pragmatically selected because they  
80 served informal settlements which have high malnutrition rates [14, 15]. Interviews and  
81 observations (time and motion studies) were used to ascertain time spent delivering and  
82 administering treatment.

83

### 84 **Ethics approval**

85 Permission to conduct the study was obtained from the African Medical and Research  
86 Foundation ethics review committee, and the county and sub county health offices. Study  
87 participants were recruited between January and March 2019. Written informed consent was  
88 obtained from participants before recruitment. The research team approached mothers,  
89 provided information about the study and inquired if they were willing to participate in the

90 study. Participants who were willing to participate were requested to sign two copies of a  
91 consent form one of which they kept. The other copy was left with the researchers.

## 92 **Participants**

93 The subjects of the time and motion observations were children and their carers attending  
94 OTP and SFP clinics and the health workers who were actively involved in their treatment.  
95 The sessions were held within child welfare clinics and reviewed both children with MAM  
96 and uncomplicated SAM, so both were included. MAM was defined as weight for length Z  
97 scores (WLZ) between -2SD and -3SD and SAM  $WLZ \leq -3SD$ . Children who had  
98 complications that required specialised care were referred elsewhere and excluded from the  
99 study.

## 100 **Interviews**

101 For the interview element the health worker responsible for MAM/SAM in each health  
102 facility was identified and interviewed using a structured schedule to establish direct and  
103 indirect costs incurred during the treatment process. Each participant was interviewed once.  
104 Information was collected about the grade of staff seeing malnourished children and matched  
105 to published pay scales [16]. They estimated the total number of children seen per day as  
106 well as time spent by staff on requisition and management of RUF and in relevant training;  
107 and RUF transportation costs were also collected.

## 108 **Time and motion observations**

109 The same researchers attended each of the 6 facilities to observe one clinic sessions in each.  
110 During each observed clinic mothers of children attending for MAM/SAM treatment were  
111 identified on arrival and observed by the researcher throughout their attendance on that day.  
112 For each child key activities were recorded, and the time taken for each noted:

113 1. Anthropometric assessments (Anthropometry)

- 114 2. Collection and recording of patient information (History taking)
- 115 3. Appetite test
- 116 4. Treatment prescription, counselling/advising (Counselling)
- 117 5. RUF management (RUF)

118 If a child required other services such as treatment for other ailments, the research assistant  
119 would pause the clock and resume timing once the child was back for OTP/SFP services. The  
120 total length of time spent on each child was then recorded.

## 121 Cost of RUF

122 The RUF were donated rather than purchased, so that the actual cost of supplies was  
123 unknown. We thus estimated the cost based on information published for by UNICEF for  
124 2019 [17]

## 125 Analysis

126 Stata Version 17 was used for the analysis. The two outcomes of interest were the total  
127 monthly staff cost of reviewing each child and dispensing RUF compared to the cost of  
128 purchasing daily RUF sachets. An ingredients-based approach was used to collect staff costs,  
129 whereby each resource required was identified and valued and healthcare provider's costs  
130 were considered. The staff costs of two main activities were considered: treatment of children  
131 with acute malnutrition and administration of RUF. The healthcare premises were treated as  
132 a standard capital cost, as any variation of interest was in the staffing time and resource use.  
133 The total time spent by each staff member per quarter for the planning and requisition for the  
134 RUF reported at the interview was recorded and converted to monthly (and annual) costs.  
135 The cost related to the planning and requisition for the RUF was the total time spent per  
136 month in hours by nutritionists in these activities, multiplied by the hourly wage. Data on

137 time spent in training related to the planning and requisition of RUF and transport costs were  
138 also added.

139 From the observational survey, we knew the average time spent per child per visit and the  
140 average per MAM and SAM child. From the interviews we knew the total number of children  
141 under treatment and the total amount of time per quarter spent on administering and  
142 dispensing RUF, so we could calculate the average cost per child on these central activities.  
143 The cost of nutritionists was calculated using their hourly wage. All staff costs were reported  
144 in US dollars and 2019 is used as the base year for the costing. At that time KES 1= USD  
145 0.0098.

## 146 Results

### 147 Time and motion results

148 Thirty-two children were observed, with 3-8 children observed per clinic; 20 were being  
149 treated for MAM and 12 for SAM. Ages ranged from 7 to 26 months, with a mean (SD) of  
150 13 (4.3) months. For 6 children, this was their first appointment with the rest attending  
151 follow-up clinics.

152 In 3 of the centres the pre-stated activities were often observed as happening at the same  
153 time, so that the amount of time spent on each activity could not be determined, except for  
154 anthropometry, but counselling was recorded as happening as a sole or mixed activity in 29  
155 (90%) children; history taking was observed in only 4 (12%) children.

156 The median (range) time spent by the family at the facility was 15 (5-46) minutes, but the  
157 mean (SD) time in all nutrition related activities was only 9.84 (5.37) minutes, of which 2.7  
158 (1.6) minutes was spent being measured (Table1). If one counts all the time where activity 4  
159 was recorded within a sole or mixed activity as counselling, the maximum time spent

160 counselling was 3.5 (2.0) minutes and only slightly more time was spent with children with  
161 SAM.



162 **Table 1: Time and motion results: time spent in different activities broken down by**  
 163 **severity.**

| <b>Time spent (minutes) on</b>           | <b>Anthropometry</b> | <b>Counselling, including when mixed with other activities</b> | <b>Total contact time</b> |
|------------------------------------------|----------------------|----------------------------------------------------------------|---------------------------|
| <b>Undernutrition status</b>             | Mean (SD)            | Mean (SD)                                                      | Mean (SD)                 |
| Moderate acute malnourished cases (n=20) | 2.3 (1.2)            | 3.9 (1.5)                                                      | 8.6 (4.8)                 |
| Severe acute malnourished cases (n=12)   | 3.3 (2.2)            | 3.1 (2.5)                                                      | 11.9 (4.7)                |
| Total (n=32)                             | 2.69 (1.6)           | 3.55 (2.0)                                                     | 9.84 (4.9)                |

164

165 **Staff costs**

166 The costs related to management of undernutrition and estimate the monthly average cost per  
 167 child contact are shown in Table 2. Centres saw on average 28 children a day (SAM and  
 168 MAM combined), but this varied widely (range 7-80 children per clinic). The hourly pay for  
 169 nutritionists was \$4.87 [16] resulting in a median cost per child contact visit of \$0.73, a  
 170 dispensing cost \$0.03 and total cost of \$0.77.

171 **Table 2: Monthly costs per child, per contact**

| <b>Centre</b> | <b>Number contacts per month</b> | <b>Total costs children contact (\$)</b> | <b>Dispensing Costs (\$)</b> | <b>Costs per child (\$)</b> |                   |              |
|---------------|----------------------------------|------------------------------------------|------------------------------|-----------------------------|-------------------|--------------|
|               |                                  |                                          |                              | <b>Contact</b>              | <b>Dispensing</b> | <b>Total</b> |
| 1             | 60                               | 43.20                                    | 1.33                         | 0.72                        | 0.02              | 0.74         |
| 2             | 80                               | 92.80                                    | 1.67                         | 1.16                        | 0.02              | 1.18         |
| 3             | 400                              | 344.00                                   | 10.03                        | 0.86                        | 0.03              | 0.89         |
| 4             | 120                              | 99.60                                    | 2.15                         | 0.83                        | 0.02              | 0.85         |
| 5             | 140                              | 182.00                                   | 47.93                        | 1.3                         | 0.34              | 1.64         |
| 6             | 1171                             | 597.21                                   | 41.45                        | 0.51                        | 0.04              | 0.55         |
|               |                                  |                                          | Mean                         | 0.82                        | 0.06              | 0.87         |
|               |                                  |                                          | (95% CI)                     | (0.66, 0.97)                | (0.02, 0.09)      | (0.70, 1.05) |
|               |                                  |                                          | Median                       | 0.73                        | 0.03              | 0.77         |
|               |                                  |                                          | (IQR)                        | (0.45, 1.10)                | (0.02, 0.04)      | (0.49, 1.16) |

172

173

174 Starting (first) appointments lasted significantly longer (17.5 mins) than follow-up  
175 appointments (8.35 mins), a mean difference of 9.15 95% CI (5.4, 12.9) min P <0.001.

176

## 177 Cost of RUF

178 The UNICEF website listed one Kenyan supplier in 2019 with a cost per carton for 150  
179 sachets of \$42, which translates into a monthly cost for treatment of MAM (30 sachets) of  
180 £7.84 per child. If RUF was not prescribed and more staff time purchased instead, this would  
181 pay for 1.6 staff hours per child per month.

## 182 Discussion

183 While Kenyan MAM protocols specify a targeted counselling approach in addition to  
184 provision of RUF, we found that in fact very little time was spent interacting with the parents  
185 of children with either MAM or SAM. The monthly staff cost of \$0.77 per month contrasts  
186 strikingly with the \$7.84 cost of the therapeutic foods dispensed which represented 91% of  
187 the total monthly treatment costs (\$8.61) per child for acute malnutrition in this setting. A  
188 limitation is that the exact product costs remain uncertain, however, the best estimate of the  
189 local price appears representative of RUF prices worldwide. The low staff costs found partly  
190 reflect the small amount of time spent, but also that salary rates in Kenya are relatively low  
191 compared to more developed countries; for example compared to a median monthly income  
192 in the USA of \$6,966, the median monthly salary in Kenya is \$897 [18]. We found that the  
193 opportunity cost of RUF per month was equivalent to 1.6 hours of staff time, so that a  
194 reduction in RUF use by half could in principle allow staff to spend 48 more minutes per  
195 month working with families: five times the amount of time spent currently. It must also be  
196 borne in mind that salary rates in Kenya are relatively high compared to other middle income

197 countries; for example the median monthly income in Nigeria is only \$446 [18], making the  
198 opportunity cost higher in other countries.

199 The economics of RUF supply are complex, as the product is usually paid for by donor  
200 agencies, while staff time spent with families comes out of local health and nutrition budgets.  
201 However, at a future time when the Kenyan health systems is expected to fund RUF  
202 themselves, planner would have to consider whether RUF was a ‘better buy’ than 1.6 hours  
203 of staff time. It must also be borne in mind that fluctuations in exchange rates would mean  
204 that the cost of RUF, purchased in dollars, could be higher. At the time of submission, the  
205 dollar exchange rate is only two thirds what it was in 2019. While RUF has been shown to be  
206 more effective than standard care in the treatment of MAM , these effects are very modest;  
207 one systematic review found a net gain of only 120g in weight following treatment [4] while  
208 another found only a 10% increase in those recovering and 0.2 SD increase in weight-for-  
209 height [5]. This small overall effect may reflect only some children responding well to RUF.  
210 Screening for MAM using MUAC also identifies stunted, non-wasted children [19] who are  
211 not malnourished and could even be harmed by RUF [6]. Further research is needed to  
212 establish which children benefit most from RUF and which children can be safely left on  
213 family diet only.

214 Counselling has generally been found to be less effective than RUF, [20] but in most trials  
215 the counselling provided was brief or group-based and not individualised. A recent study in  
216 Kenya found many potentially reversible risk factors present in children with MAM [7]  
217 which will remain unrecognised in a programme where only RUF was offered. One recent  
218 large trial found that well-staffed individualised counselling was as effective as RUF, after  
219 allowance for higher rates of attrition [21]. Future trials of counselling will also need to  
220 consider how to incentivise parental engagement when supplementary food is not given.

221 Previous studies of the cost effectiveness of community management of SAM argued that  
222 they were cost effective because of the relatively low base case cost (US\$53) per disability-  
223 adjusted life year gained [11] although another accepted that the worst case cost might be as  
224 much as ten times that [12]. However, the same sort of scrutiny has not yet been applied to  
225 MAM. One study compared the cost of different supplementary foods used for MAM  
226 treatment and found that their costs per recovered child were similar (US\$163-79).  
227 However, with no control group, many of these recoveries would have occurred  
228 spontaneously [22] and with no counselling arm it was not clear how this would compare to  
229 counselling [13]. The review above [5] would suggest that 10 children would need to be  
230 treated for one extra recovery, suggesting a cost per extra recovery possibly ten times higher.  
231 Using Kenyan salary scales this could pay a nutritionist for 2 months.  
232 The strength of this study is that it provides a first proper disaggregation of time and product  
233 in the management of acute malnutrition. A limitation is that it examines this in only one  
234 setting. In some cases, there was an overlap of activities, so that counselling and RUF  
235 management time might also have included recording patient information, but the total time  
236 spent is still very brief. One of the included centres is known to schedule in a single  
237 counselling session separately at the end of treatment, which was not counted in this  
238 observation, and this centre had the lowest contact time overall. While the focus of this paper  
239 is MAM, we also observed the SAM children seen in the same sessions and included them in  
240 our calculations, as in practice there were only margin differences in the time spent with  
241 them.  
242 It is often assumed that programs that require extra staff time are less affordable where a  
243 product can simply be provided. However, in an LMIC setting, staff salaries are low and  
244 even apparently cheap products prove expensive if given over longer periods. In the long

245 term, investment in staff and skills is more likely to be sustainable and effective, as staff can  
246 address multiple health and wellbeing issues at the same time.

## 247 **Conclusions**

248 This study reveals that very little time is currently spent speaking to mothers of malnourished  
249 children and that RUF is extremely expensive relative to other health system costs. Well-  
250 staffed trials of the efficacy and cost-effectiveness of problem-oriented counselling  
251 interventions are needed, but this study illustrates that these could be highly affordable.

## 252 **Acknowledgments**

253 We are grateful to the staff of the participating clinics and to Hermann Donfouet for his initial  
254 analysis of the data.

## 255 References

- 256 1. Olofin I, McDonald CM, Ezzati M, Flaxman S, Black RE, Fawzi WW, et al. Associations of  
257 Suboptimal Growth with All-Cause and Cause-Specific Mortality in Children under Five Years: A  
258 Pooled Analysis of Ten Prospective Studies. PLOS ONE. 2013;8(5):e64636. doi:  
259 10.1371/journal.pone.0064636.
- 260 2. UNICEF, WHO, The World Bank. Levels and trends in child malnutrition: Key Findings of the  
261 2020 Edition of the Joint Child Malnutrition Estimates. Geneva: World Health Organization 2020.
- 262 3. WHO. Technical Note: Supplementary foods for the management of moderate acute  
263 malnutrition in infants and children 6-59 months of age. Geneva: WHO, 2012.
- 264 4. Kristjansson E, Francis DK, Liberato S, Benkhalti Jandu M, Welch V, Batal M, et al. Food  
265 supplementation for improving the physical and psychosocial health of socio-economically  
266 disadvantaged children aged three months to five years. The Cochrane database of systematic  
267 reviews. 2015;(3):CD009924. Epub 2015/03/06. doi: 10.1002/14651858.CD009924.pub2. PubMed  
268 PMID: 25739460; PubMed Central PMCID: PMC6885042.
- 269 5. Lazerini M, Rubert L, Pani P. Specially formulated foods for treating children with moderate  
270 acute malnutrition in low- and middle-income countries. Cochrane Database of Systematic Reviews.  
271 2013;(6). doi: 10.1002/14651858.CD009584.pub2. PubMed PMID: CD009584.
- 272 6. WHO. Guideline: assessing and managing children at primary health-care facilities to prevent  
273 overweight and obesity in the context of the double burden of malnutrition. . Geneva: World Health  
274 organization 2017.
- 275 7. Mutoro AN, Garcia AL, Kimani-Murage EW, Wright CM. Prevalence and overlap of known  
276 undernutrition risk factors in children in Nairobi Kenya. Maternal & child nutrition. 2021:e13261.  
277 Epub 2021/08/07. doi: 10.1111/mcn.13261. PubMed PMID: 34355500.
- 278 8. Kenya Ministry of Medical Services and Ministry of Public Health and Sanitation. Handbook -  
279 integrated management of acute malnutrition. 2010.
- 280 9. Mayén VA, Kimani-Murage E, Bryant-Waugh R, Traynor O, Milligan B, Khan A, et al. Are  
281 Malnourished Children Hungry? Use of the International Complementary Feeding Assessment Tool  
282 (ICFET) to Describe Diet and Eating Behavior. Current Developments in Nutrition.  
283 2020;4(Supplement\_2):924-. doi: 10.1093/cdn/nzaa053\_129.
- 284 10. Garg CC, Mazumder S, Taneja S, Shekhar M, Mohan SB, Bose A, et al. Costing of three  
285 feeding regimens for home-based management of children with uncomplicated severe acute  
286 malnutrition from a randomised trial in India. BMJ Global Health. 2018;3(2):e000702. doi:  
287 10.1136/bmjgh-2017-000702.
- 288 11. Bachmann MO. Cost-effectiveness of community-based treatment of severe acute  
289 malnutrition in children. Expert Rev Pharmacoecon Outcomes Res. 2010;10(5):605-12. Epub  
290 2010/10/19. doi: 10.1586/erp.10.54. PubMed PMID: 20950075.
- 291 12. Wilford R, Golden K, Walker DG. Cost-effectiveness of community-based management of  
292 acute malnutrition in Malawi. Health Policy Plan. 2012;27(2):127-37. Epub 2011/03/08. doi:  
293 10.1093/heapol/czr017. PubMed PMID: 21378101.
- 294 13. Griswold SP, Langlois BK, Shen Y, Cliffer IR, Suri DJ, Walton S, et al. Effectiveness and cost-  
295 effectiveness of 4 supplementary foods for treating moderate acute malnutrition: results from a  
296 cluster-randomized intervention trial in Sierra Leone. The American journal of clinical nutrition.  
297 2021;114(3):973-85. Epub 2021/05/22. doi: 10.1093/ajcn/nqab140. PubMed PMID: 34020452;  
298 PubMed Central PMCID: PMC68408853.
- 299 14. Kimani-Murage EW, Muthuri SK, Oti SO, Mutua MK, van de Vijver S, Kyobutungi C. Evidence  
300 of a Double Burden of Malnutrition in Urban Poor Settings in Nairobi, Kenya. PloS one.  
301 2015;10(6):e0129943. Epub 2015/06/23. doi: 10.1371/journal.pone.0129943. PubMed PMID:  
302 26098561; PubMed Central PMCID: PMC4476587.

- 303 15. Concern Worldwide. Nutrition Survey Conducted in the Slums of Nairobi County. Nairobi,  
304 Kenya Concern Worldwide 2017.
- 305 16. Owino A. Job Groups in Kenya: Civil Servants Salary Nairobi, Kenya2019 [cited 2020 04/09].  
306 Available from: <https://www.kenyans.co.ke/news/42378-job-groups-kenya-civil-servants-salary>.
- 307 17. UNICEF. Ready-to-use therapeutic food (RUTF) price data. Copenhagen: UNICEF, division S;  
308 2022.
- 309 18. Salary and Cost of Living Comparison [Internet]. 2022. Available from:  
310 <http://www.salaryexplorer.com/>.
- 311 19. Binns P, Myatt M. Does treatment of short or stunted children aged 6-59 months for severe  
312 acute malnutrition using ready to use therapeutic food make them overweight? Data from Malawi.  
313 Arch Public Health. 2018;76:78. doi: 10.1186/s13690-018-0321-1. PubMed PMID: 30559964;  
314 PubMed Central PMCID: PMC6292002.
- 315 20. Lelijveld N, Beedle A, Farhikhtah A, Elrayah EE, Bourdaire J, Aburto N. Systematic review of  
316 the treatment of moderate acute malnutrition using food products. Maternal & child nutrition.  
317 2020;16(1):e12898. Epub 2019/11/02. doi: 10.1111/mcn.12898. PubMed PMID: 31667981; PubMed  
318 Central PMCID: PMC7038867.
- 319 21. Nikiema L, Huybregts L, Kolsteren P, Lanou H, Tiendrebeogo S, Bouckaert K, et al. Treating  
320 moderate acute malnutrition in first-line health services: an effectiveness cluster-randomized trial in  
321 Burkina Faso. The American journal of clinical nutrition. 2014;100(1):241-9. Epub 2014/05/09. doi:  
322 10.3945/ajcn.113.072538. PubMed PMID: 24808482.
- 323 22. James P, Sadler K, Wondafrash M, Argaw A, Luo H, Geleta B, et al. Children with Moderate  
324 Acute Malnutrition with No Access to Supplementary Feeding Programmes Experience High Rates of  
325 Deterioration and No Improvement: Results from a Prospective Cohort Study in Rural Ethiopia. PLoS  
326 one. 2016;11(4):e0153530. doi: 10.1371/journal.pone.0153530. PubMed PMID: 27100177; PubMed  
327 Central PMCID: PMC4839581.
- 328
